# Supplementary material for: Local network connectivity optimization: an evaluation of heuristics applied to complex spatial networks, a transportation case study, and a spatial social network
Source: PeerJ journal article supplement (doi:10.7717/peerj-cs.605), 2021-06-18
Supplement: sup_mat.pdf [file sup_mat.pdf]

## Supporting Information

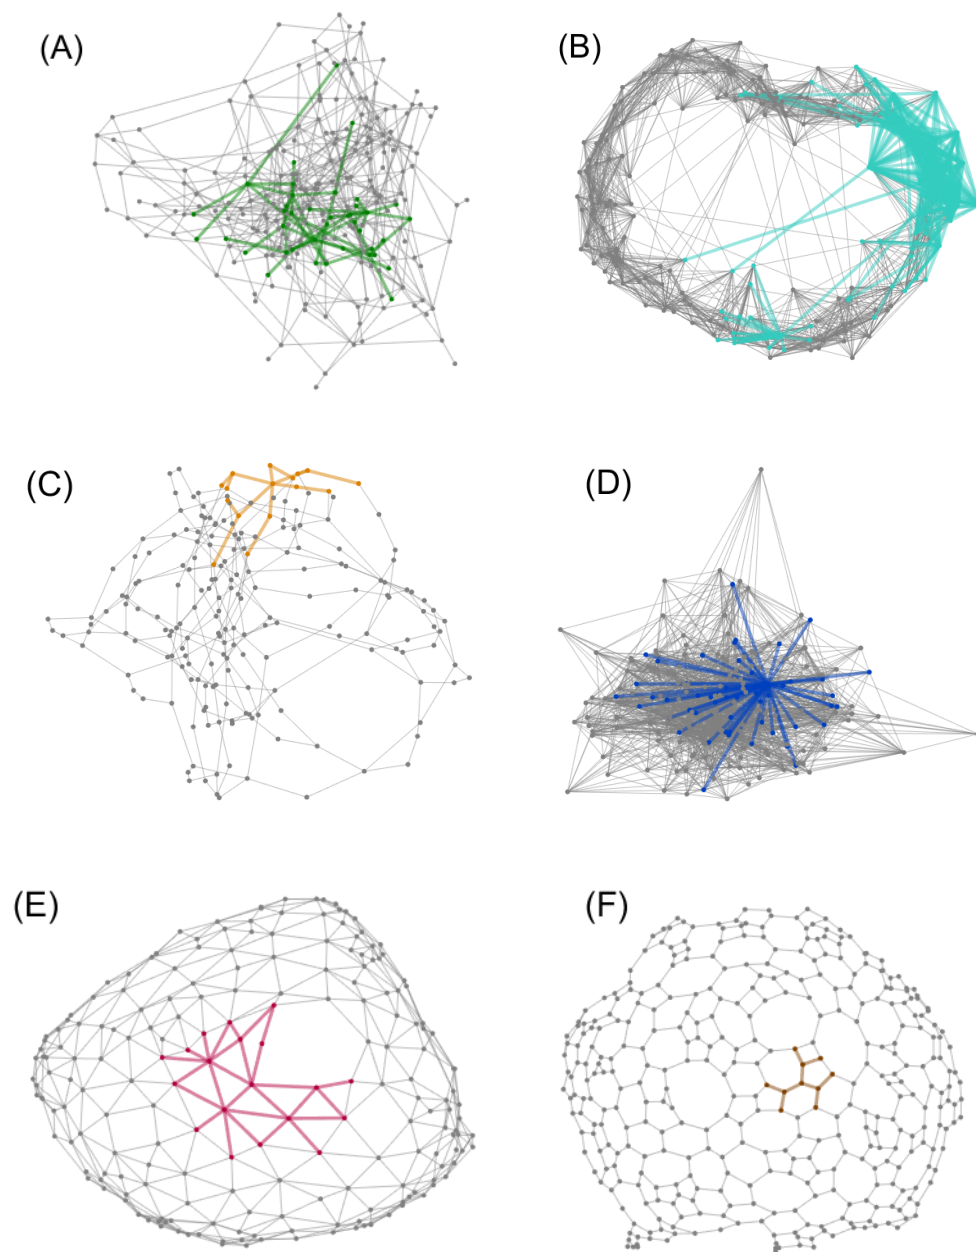

Figure S.1: Examples of the random graphs ( $N = 250$ ) used for the analysis: (A) Erdős-Rényi network, (B) Watts-Strogatz network, (C) Barabási and Albert network, and (D) Klemm and Eguílez network, (E) Delaunay network, and (F) Voronoi network. The colored subgraph represents the close nodes to a random focal node with high connectivity and the edge weights (distances) are not to scale for a clearer visualization.

| Local search selection criteria |                                                                                                                                                      |                                                                                                              |
|---------------------------------|------------------------------------------------------------------------------------------------------------------------------------------------------|--------------------------------------------------------------------------------------------------------------|
| Nodal characteristics           | distance from focal node<br>$d(i, F)$                                                                                                                | degree centrality<br>$C_i^D = \sum_j A(i, j)$                                                                |
|                                 | closeness centrality<br>$C_i^C = 1/\sum_j d(i, j)$                                                                                                   | betweenness centrality<br>$C_i^B = \sum_{j \neq i \neq k} \frac{\sigma_{jk}(i)}{\sigma_{jk}}$                |
|                                 | eigenvector centrality<br>$C_i^E = \frac{1}{\lambda} \sum_j A(i, j)x_j$                                                                              | pagerank centrality<br>$C_i^P = \alpha_P \sum_j A(i, j) \frac{x_j}{\sum_i A(i, j)} + \frac{1 - \alpha_P}{N}$ |
|                                 | weighted clustering coefficient<br>$c_i^w = \frac{1}{(C_i^D - 1) \sum_j a_{ij} w_{ij}} \sum_{j, h} \frac{(w_{ij} + w_{ih})}{2} a_{ij} a_{ih} a_{jh}$ |                                                                                                              |
| Clusters                        | hierarchical clusters                                                                                                                                |                                                                                                              |
|                                 | network-constrained clusters                                                                                                                         |                                                                                                              |
|                                 | network modularity                                                                                                                                   |                                                                                                              |

Table S.1: Node characteristics used for the neighborhood search and their formulations.

**Measures of network complexity.** To evaluate the complexity of the random Voronoi networks and random Delaunay networks we use the following measures that capture the random, scale-free, and small-world features of complex networks: average degree, average path length, weighted clustering coefficient, proximity ratio, global efficiency, and power law (see Table S.2 for the mathematical formulations of these characteristics). General measures of connectivity and network topology (for connected graphs) include the mean degree and the average path length, which refers to the average number of edges within the shortest path for all pairs of nodes in a network [1]. The weighted clustering coefficient of a node is the ratio of the node degree and the total number of possible edges for a node in the network [2]. The global version of this measure is the average of the node weighted clustering coefficients and provides an estimate of small-world-ness [3]. The proximity ratio is the ratio of the following ratios: (i) the average weighted clustering coefficient and the average path length and (ii) the average weighted clustering coefficient for a completely random network of the same size and the average path length for that random network of the same size. This provides a measure of the small-world-ness of networks, with  $S = 1$  for random networks and  $S \gg 1$  for small-world networks [4]. Another measure of small-world-ness is average efficiency which is the average of the inverses of the network's shortest paths and captures the network's ability to exchange information between nodes [5]. If the degree distribution of the nodes follows a power law, then the network is said to be scale-free, i.e. random with some highly connected nodes [6].

| Measures of network complexity                                               |                                                                                                      |
|------------------------------------------------------------------------------|------------------------------------------------------------------------------------------------------|
| mean degree<br>$\overline{C}_D = \frac{\sum_i C_i^D}{N}$                     | average path length<br>$L = \frac{1}{N(N-1)} \sum_i \sum_{j>i} d(i, j)$                              |
| weighted clustering coefficient<br>$\overline{C} = \frac{1}{N} \sum_i c_i^w$ | proximity ratio<br>$S = \frac{\overline{C}/L}{\overline{C}_r/L_r}$                                   |
| power law<br>$P(n) \approx n^{-\gamma}$                                      | global efficiency<br>$E_G = \frac{E}{E_r}, E = \frac{1}{N(N-1)} \sum_i \sum_{j>i} \frac{1}{d(i, j)}$ |

Table S.2: The measures used to evaluate network complexity.

|                  | Delaunay |        |        | Voronoi |        |        |
|------------------|----------|--------|--------|---------|--------|--------|
| $N$              | 500      | 1000   | 2000   | 500     | 1000   | 2000   |
| $\overline{C}_D$ | 4.708    | 5.392  | 5.208  | 2.840   | 2.900  | 2.938  |
| $L$              | 9        | 12     | 17     | 21      | 29     | 40     |
| $\overline{C}$   | 0.003    | 0.003  | 0.003  | 0.006   | 0.003  | 0.003  |
| $S$              | 1.005    | 0.991  | 0.980  | 0.845   | 0.091  | 0.089  |
| $\gamma$         | 1.667    | 1.800  | 3.000  | 837     | 1784   | 1907   |
| $E_G$            | 0.0724   | 0.0523 | 0.0385 | 0.0328  | 0.0238 | 0.0177 |

Table S.3: The average characteristics of 1000 random Delaunay and Voronoi networks.

|                  | Suburban school network |        |        |        |        |        | Rural school network |        |        |        |
|------------------|-------------------------|--------|--------|--------|--------|--------|----------------------|--------|--------|--------|
|                  | Elementary              |        |        | Middle |        |        | Elementary           |        |        |        |
|                  | SE(1)                   | SE(2)  | SE(3)  | SM(1)  | SM(2)  | SM(3)  | RE(1)                | RE(2)  | RE(3)  | RE(4)  |
| $N$              | 3952                    | 4222   | 5149   | 7750   | 4895   | 8059   | 1727                 | 2160   | 1539   | 1996   |
| $N_C$            | 1772                    | 1807   | 1077   | 4614   | 1198   | 2210   | 416                  | 330    | 363    | 735    |
| $N_D$            | 2180                    | 2415   | 4072   | 3136   | 3697   | 5849   | 1311                 | 1830   | 1176   | 1261   |
| $L_F$            | 50                      | 96     | 194    | 110    | 43     | 103    | 51                   | 95     | 50     | 52     |
| $\overline{C}_D$ | 2                       | 2      | 2      | 2      | 2      | 2      | 2                    | 2      | 2      | 2      |
| $L$              | 80                      | 133    | 183    | 135    | 72     | 123    | 77                   | 88     | 71     | 82     |
| $\gamma$         | 1179                    | 1300   | 1604   | 2353   | 1432   | 2427   | 761                  | 967    | 679    | 891    |
| $E_G$            | 0.0060                  | 0.0060 | 0.0045 | 0.0052 | 0.0074 | 0.0056 | 0.0078               | 0.0080 | 0.0104 | 0.0092 |

Table S.4: The network characteristics of the street networks around the schools used for the study. The average weighted clustering coefficient  $\overline{C}$  was not calculated since triplets were uncommon in these networks and neither was the proximity ratio  $S$  since it depends on  $\overline{C}$ .

| Parameter                  |       | Description                | Values          |
|----------------------------|-------|----------------------------|-----------------|
|                            | $N$   | Number of nodes            | 500, 1000, 2000 |
| Erdős-Rényi graphs         | $p$   | connection probability     | 0.01            |
| Watts-Strogatz graphs      | $p_W$ | rewiring probability       | 0.01            |
|                            | $k_L$ | initial node degree        | 10              |
| Barabási and Albert graphs | $m_0$ | connected network size     | 10              |
|                            | $m$   | degree of new nodes        | $m_0$           |
| Klemm and Eguílez graphs   | $m_0$ | connected network size     | 10              |
|                            | $p_S$ | node selection probability | 0.1             |
|                            | $p$   | connection probability     | 0.01            |
| Delaunay random graphs     | $p_R$ | edge removal probability   | 0.1             |
| Voronoi random graphs      | $p_R$ | edge removal probability   | 0.1             |

Table S.5: The random network parameters and values used for the analysis. Following [6], the degree of new nodes for the Barabási and Albert graphs were equal to the initial network size ( $m = m_0$ ).

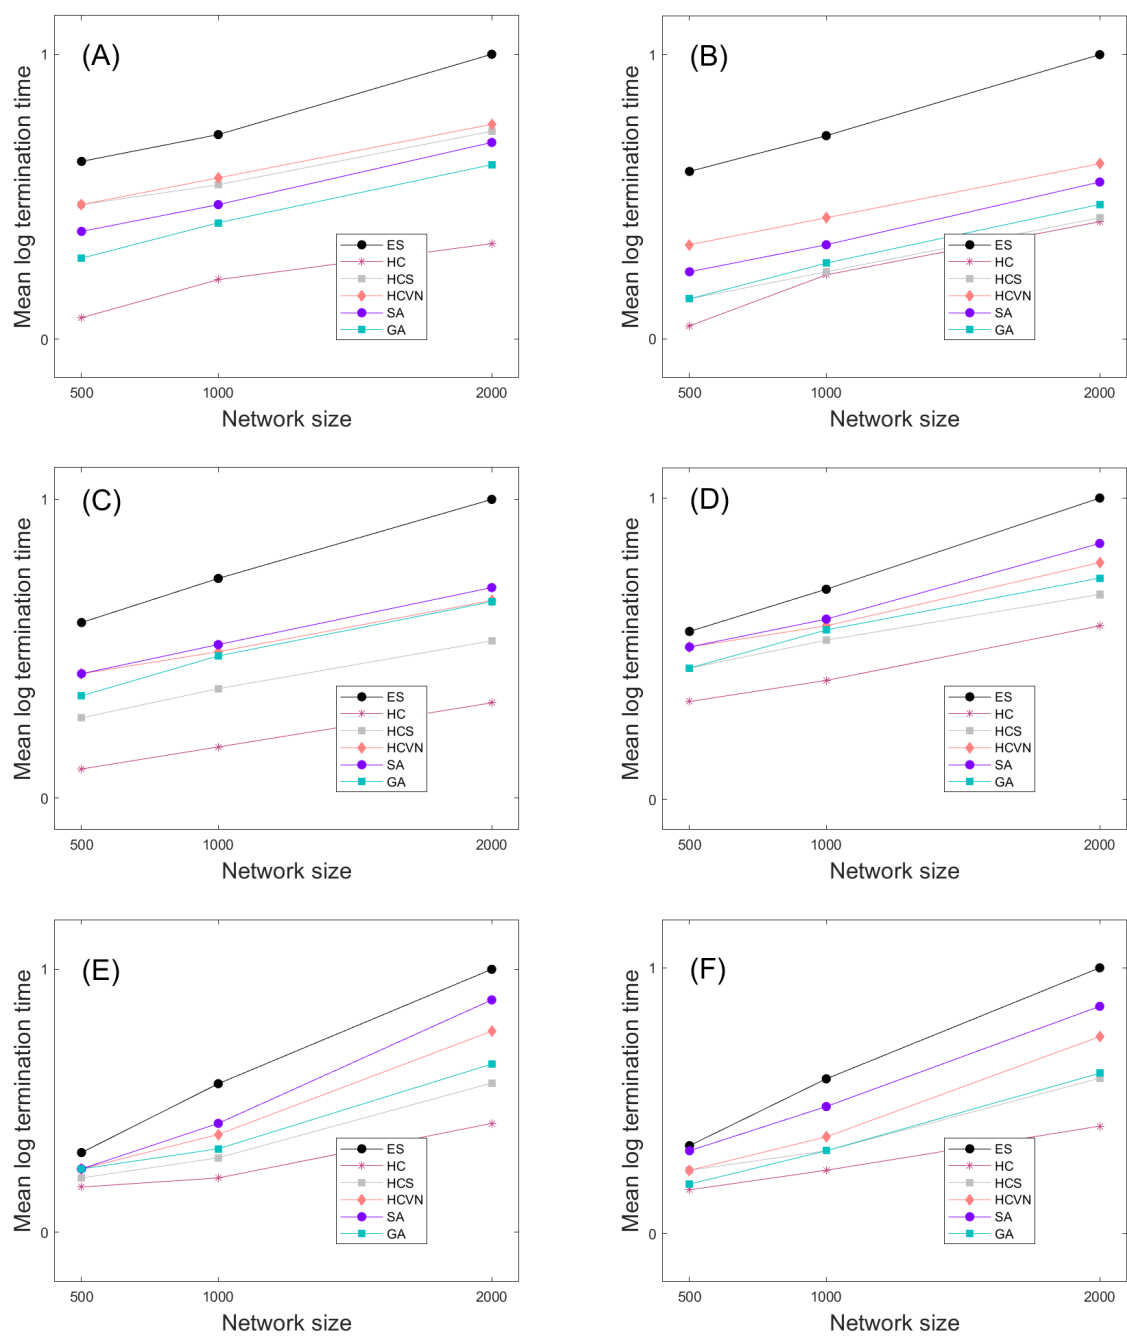

Figure S.2: The termination times for the heuristics applied to the random networks: (a) Erdős-Rényi networks, (b) Watts-Strogatz networks, (c) Barabási and Albert networks, and (d) Klemm and Egúlez networks, (e) Delaunay networks, and (f) Voronoi networks. These are average times for 1000 random restarts for optimization applied to 1000 random network of each type and size. The times are scaled by the exhaustive search time and log transformed for easier interpretation.

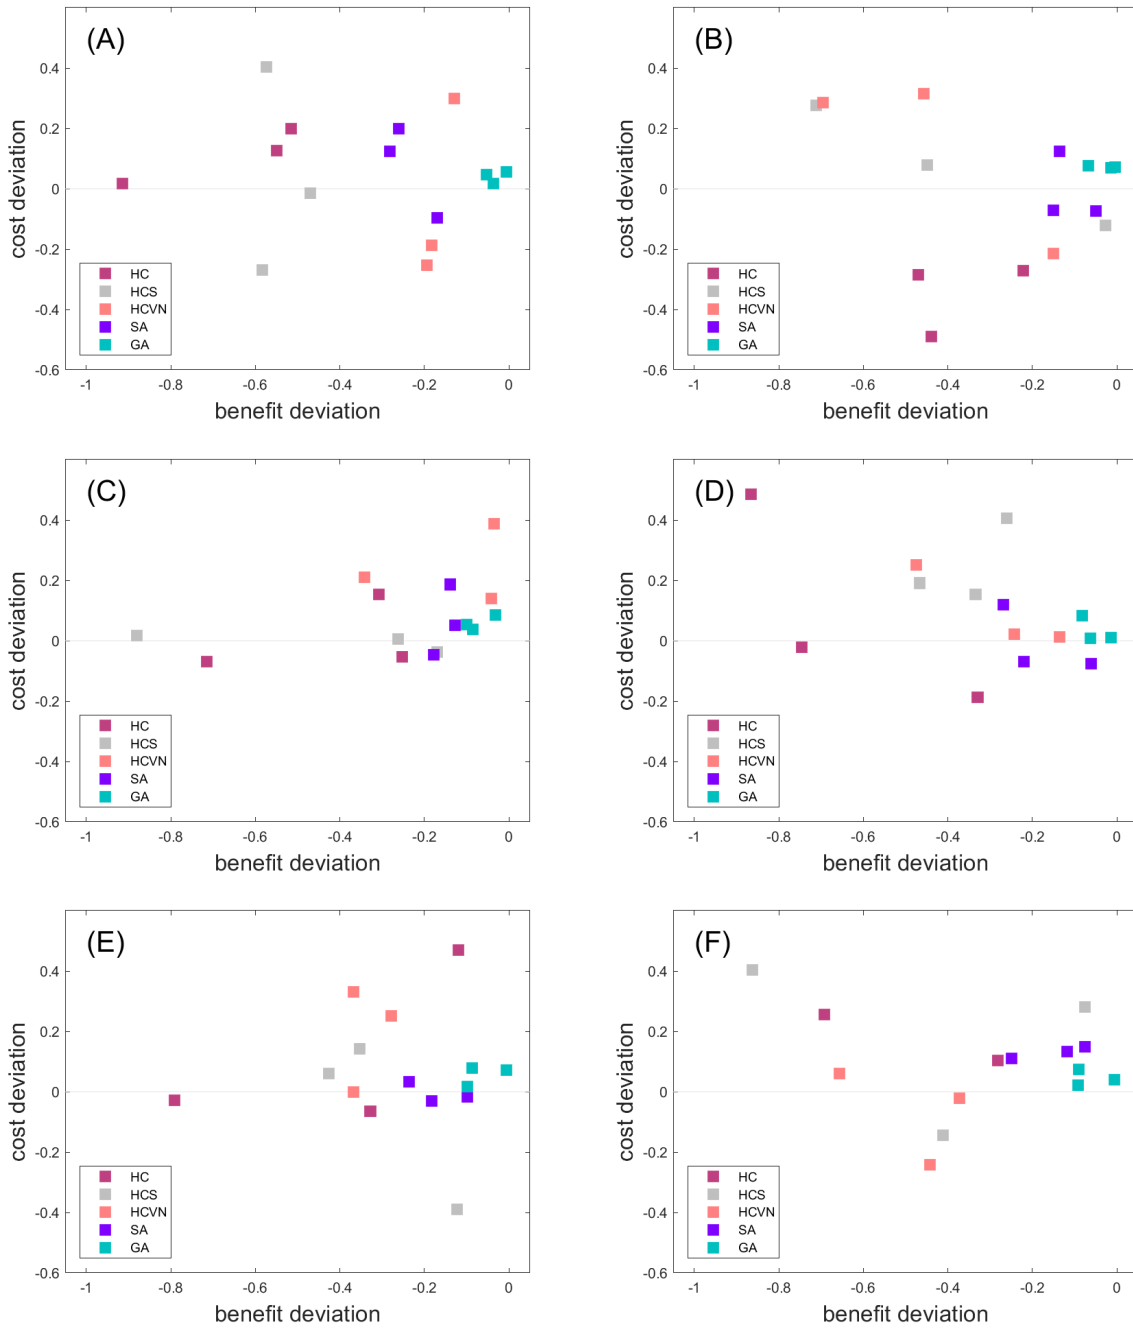

Figure S.3: The cost and benefit deviations for the heuristics applied to the random networks: (a) Erdős-Rényi networks, (b) Watts-Strogatz networks, (c) Barabási and Albert networks, and (d) Klemm and Egúlez networks, (e) Delaunay networks, and (f) Voronoi networks. Each point represents the results for a given method and network size ( $N = 500, 1000, 2000$ ). The costs and benefits were scaled by the results from the exhaustive search, where a longer connection length is a positive cost deviation and a shorter connection is a negative cost deviation. These are average times for 1000 random restarts for optimization applied to 1000 random network of each type and size.

---

**Algorithm 1**Exhaustive search pseudocode

---

```
for  $i$  in  $N_D$  do                                     ▷ Select a distant node.
  for  $j$  in  $N_C$  do                                     ▷ Select each close node.
    if  $d(i, j) + d(j, S) < D$  then                       ▷ If node will be within the distance.
       $C(i, j) = d(i, j)$                                    ▷ Calculate the cost of the connection, i.e. the length.
      for  $k$  in  $N_D$  do                                     ▷ Select each distant node.
        if  $d(k, i) + d(i, j) + d(j, S) < D$  then         ▷ Calculate the distance to the focal node.
           $k \in N'_C$                                        ▷ If node is within the distance assign it to the new close set.
        end if
      end for
       $B(i, j) = |N'_C|$                                    ▷ Calculate the number of new close nodes.
    end if
  end for
end for
```

---

---

**Algorithm 2**Hill climbing

---

```
randomly select  $i$  from  $N_D$ 
randomly select  $j$  from  $N_C$ 
 $C(i, j) = d(i, j)$ 
for  $k$  in  $N_D$  do
  if  $d(k, i) + d(i, j) + d(j, F) < D$  then
     $k \in N'_C$ 
  end if
end for
 $B(i, j) = |N'_C|$ 
 $O^0 = \alpha C(i, j) + \beta B(i, j)$ 
 $t = 1$ 
while  $O^t \neq O^{t-1}$  do
   $N_i^D =$  neighbors of  $i$  in  $N_D$ 
   $N_j^C =$  neighbors of  $j$  in  $N_C$ 
  for  $m$  in  $N_i^D$  do
    for  $n$  in  $N_j^C$  do
       $C(m, n) = d(m, n)$ 
      for  $k$  in  $N_D$  do
        if  $d(k, m) + d(m, n) + d(n, F) < D$  then
           $k \in N'_C$ 
        end if
      end for
       $B(m, n) = |N'_C|$ 
    end for
  end for
   $O^t = \max_{(m,n)} (\alpha C(m, n) + \beta B(m, n))$ 
   $t = t + 1$ 
end while
```

---



---

**Algorithm 3**Stochastic hill climbing

---

```
randomly select  $i$  from  $N_D$ 
randomly select  $j$  from  $N_C$ 
 $C(i, j) = d(i, j)$ 
for  $k$  in  $N_D$  do
  if  $d(k, i) + d(i, j) + d(j, F) < D$  then
     $k \in N'_C$ 
  end if
end for
 $B(i, j) = |N'_C|$ 
 $O^0 = \alpha C(i, j) + \beta B(i, j)$ 
 $t = 1$ 
while  $O^t \neq O^{t-1}$  do
   $N_i^D =$  neighbors of  $i$  in  $N_D$ 
   $N_j^C =$  neighbors of  $j$  in  $N_C$ 
  for  $m$  in  $N_i^D$  do
    for  $n$  in  $N_j^C$  do
       $C(m, n) = d(m, n)$ 
      for  $k$  in  $N_D$  do
        if  $d(k, m) + d(m, n) + d(n, F) < D$  then
           $k \in N'_C$ 
        end if
      end for
       $B(m, n) = |N'_C|$ 
    end for
  end for
   $O^t = \alpha C(i, j) + \beta B(i, j)$  with probability  $(i, j) = \frac{\alpha C(i, j) + \beta B(i, j)}{\sum_{(m, n)} (\alpha C(m, n) + \beta B(m, n))}$ 
   $t = t + 1$ 
end while
```

---

---

**Algorithm 4**Hill climbing with a variable neighborhood

---

```
set  $n_{max}$ 
randomly select  $i$  from  $N_D$ 
randomly select  $j$  from  $N_C$ 
 $C(i, j) = d(i, j)$ 
for  $k$  in  $N_D$  do
  if  $d(k, i) + d(i, j) + d(j, F) < D$  then
     $k \in N'_C$ 
  end if
end for
 $B(i, j) = |N'_C|$ 
 $O^0 = \alpha C(i, j) + \beta B(i, j)$ 
 $\eta = 1$ 
 $t = 1$ 
while  $\eta < \eta_{max}$  do
   $N_i^D =$  neighbors of  $i$  in  $N_D$ 
   $N_j^C =$  neighbors of  $j$  in  $N_C$ 
  for  $m$  in  $N_i^D$  do
    for  $n$  in  $N_j^C$  do
       $C(m, n) = d(m, n)$ 
      for  $k$  in  $N_D$  do
        if  $d(k, m) + d(m, n) + d(n, F) < D$  then
           $k \in N'_C$ 
        end if
      end for
       $B(m, n) = |N'_C|$ 
    end for
  end for
   $O^t = \max_{(m,n)} (\alpha C(m, n) + \beta B(m, n))$ 
  if  $O^t > O^{t-1}$  then
     $\eta = 1$ 
  else
     $\eta = \eta + 1$ 
  end if
   $t = t + 1$ 
end while
```

---

---

**Algorithm 5**Simulated annealing

---

```
randomly select  $i$  from  $N_D$ 
randomly select  $j$  from  $N_C$ 
 $C(i, j) = d(i, j)$ 
for  $k$  in  $N_D$  do
  if  $d(k, i) + d(i, j) + d(j, F) < D$  then
     $k \in N'_C$ 
  end if
end for
 $B(i, j) = |N'_C|$ 
 $O^0 = \alpha C(i, j) + \beta B(i, j)$ 
 $t = 1$ 
while  $O^t \neq O^{t-1}$  do
   $N_i^D =$  neighbors of  $i$  in  $N_D$ 
   $N_j^C =$  neighbors of  $j$  in  $N_C$ 
  for  $m$  in  $N_i^D$  do
    for  $n$  in  $N_j^C$  do
       $C(m, n) = d(m, n)$ 
      for  $k$  in  $N_D$  do
        if  $d(k, m) + d(m, n) + d(n, F) < D$  then
           $k \in N'_C$ 
        end if
      end for
       $B(m, n) = |N'_C|$ 
       $O(m, n) = \alpha C(m, n) + \beta B(m, n)$ 
    end for
  end for
  if  $\max_{(m,n)} O(m, n) > O^{t-1}$  then
     $O^t = O(m, n)$ 
  else
     $O^t = O(m, n)$  with probability  $(m, n) = \exp\left(-\frac{O^{t-1} - O(m, n)}{t}\right)$ 
  end if
   $t = t + 1$ 
end while
```

---

---

**Algorithm 6**Genetic algorithm

---

 $\mu$  = mutation rate $s$  = selection coefficient $P$  = randomly selected populationChromosome( $i$ ) = (1...1)Chromosome( $j$ ) = (1...1)**for** ( $i, j$ ) **in**  $P$  **do** $C(i, j) = d(i, j)$ **for**  $k$  **in**  $N_D$  **do****if**  $d(k, i) + d(i, j) + d(j, F) < D$  **then** $k \in N'_C$ **end if****end for** $B(i, j) = |N'_C|$  $O(i, j)^0 = \alpha C(i, j) + \beta B(i, j)$ **end for** $t = 1$ **while**  $\max_{(i,j)} O(i, j)^t \neq \max_{(i,j)} O(i, j)^{t-1}$  **do**

$$f(i, j) = \frac{O(i, j)}{\sum_{(i,j)} O(i, j)}$$

$$\text{populate } P \text{ with } (i, j) \text{ with probability}(i, j) = \frac{s * f(i, j) + (1 - s)}{\sum_{(m,n)} (s * f(m, n) + (1 - s))}$$

cycle crossover

**for**  $k$  **in**  $P$  **do****for**  $\ell$  **in** chromosome( $k$ ) **do****if** random number  $\leq \mu$  **then**gene( $k, \ell$ ) = gene( $k, \ell$ ) + 1**end if****end for****end for****for** ( $i, j$ ) **in**  $P$  **do**randomly select  $m$  from  $N_i^D$  with probability  $\text{gene}(i, m) / \sum_k \text{gene}(i, k)$ randomly select  $n$  from  $N_j^C$  with probability  $\text{gene}(j, n) / \sum_k \text{gene}(j, k)$  $C(m, n) = d(m, n)$ **for**  $k$  **in**  $N_D$  **do****if**  $d(k, m) + d(m, n) + d(n, F) < D$  **then** $k \in N'_C$ **end if****end for** $B(m, n) = |N'_C|$  $O(m, n)^t = \alpha C(m, n) + \beta B(m, n)$ **end for** $t = t + 1$ **end while**

---

## References

- [1] Albert, R. & Barabási, A. Statistical mechanics of complex networks. *Reviews of Modern Physics* **74**, 47–97 (2002).
- [2] Luce, R. & Perry, A. A method of matrix analysis of group structure. *Psychometrika* **14**, 95–116 (1949).
- [3] Watts, D. J. & Strogatz, S. H. Collective dynamics of “small-world” networks. *Nature* **393**, 440–442 (1998).
- [4] Walsh, T. Search in a small world. In Dean, T. (ed.) *Proceedings of the 16th International Joint Conference on Artificial Intelligence* (Morgan Kaufmann, 1999).
- [5] Latora, V. & Marchiori, M. Efficient behavior of small-world networks. *Physical Review Letters* **87** (2001).
- [6] Barabási, A. & Albert, R. Emergence of scaling in random networks. *Science* **286**, 509–512 (1999).
